# Supplementary material for: Sequential viral introductions and spread of BA.1 across Pakistan provinces during the Omicron wave
Source: PubMed Central journal article supplement (PMC10399012; doi:10.1186/s12864-023-09539-3), 2023-08-03

**Supplementary Figure 1. SARS-CoV-2 genome submissions in GISAID from Pakistan.** Distribution of 1031 sequences submitted by Pakistan from December 1, 2021 till August 14, 2022. On x-axis are the date in month-year format and y-axis represents the number of SARS-CoV-2 genome submissions in GISAID. Orange circles show the exact number of sequences. \*Partial data for August (till August 14, 2022).

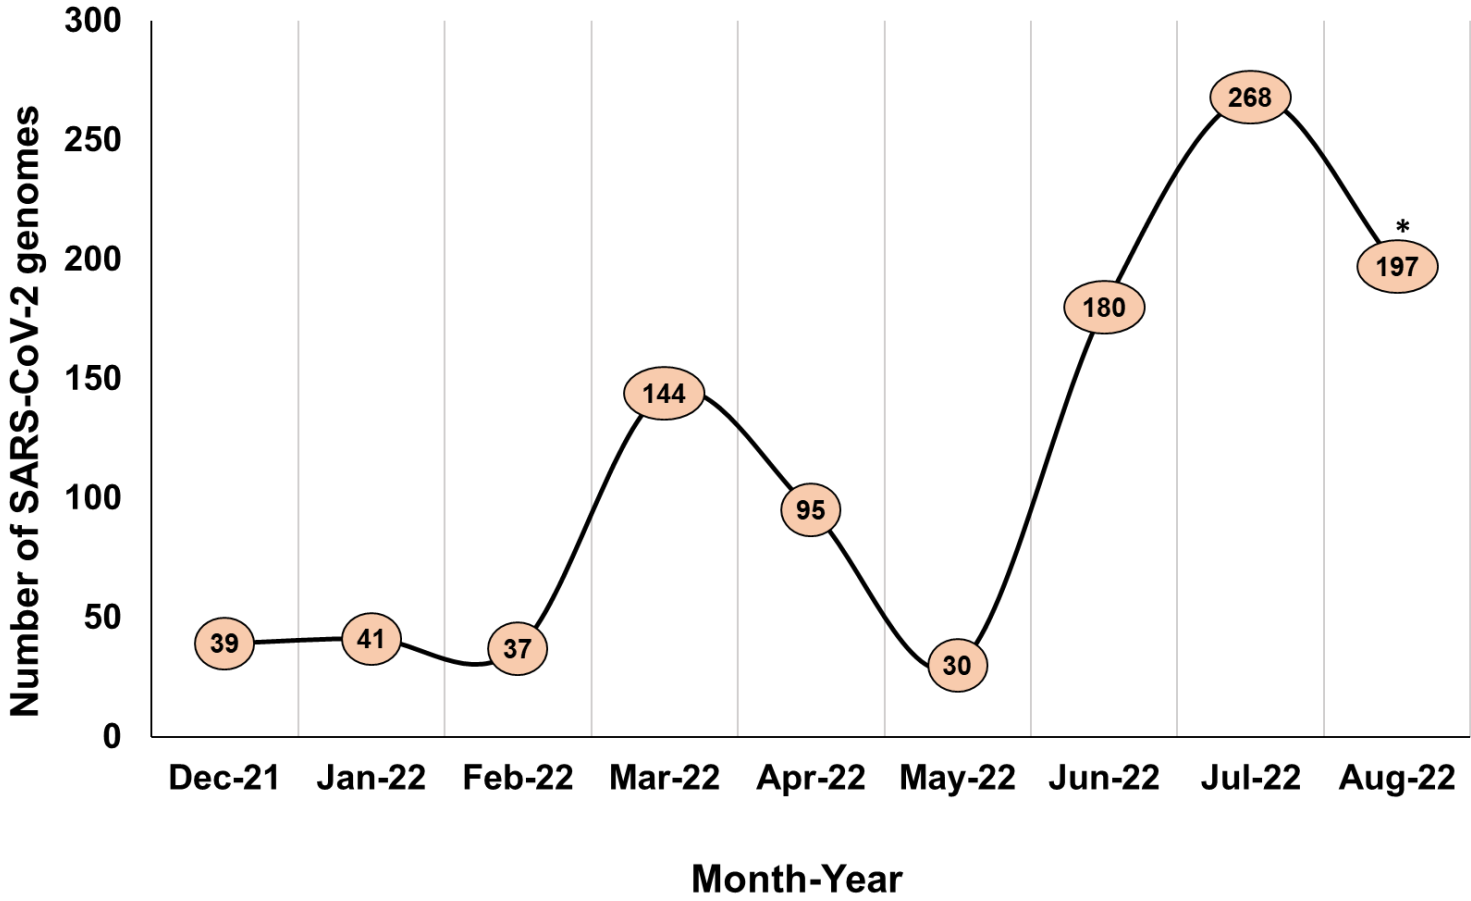

Supplement: 12864_2023_9539_MOESM2_ESM.pdf [file 12864_2023_9539_MOESM2_ESM.pdf]
